# Supplementary material for: Iron oxide nanoparticles as a drug carrier reduce host immunosuppression for enhanced chemotherapy
Source: Royal Society of Chemistry journal article supplement (doi:10.1039/d1nr07750c), 2022-01-01
Supplement: d1nr07750c1.pdf [file d1nr07750c1.pdf]

## Electronic Supplementary Information

### Iron oxide nanoparticles as a drug carrier reduce host immunosuppression for enhanced chemotherapy

Benqing Zhou,<sup>\*a</sup> Jinxing Liu,<sup>a</sup> Lu Wang,<sup>b</sup> Meng Wang,<sup>c</sup> Chong Zhao,<sup>a</sup> Haoyu Lin,<sup>d</sup> Yuanke Liang,<sup>d</sup>

Rheal A. Towner,<sup>e</sup> and Wei R. Chen<sup>b</sup>

<sup>a</sup> Department of Biomedical Engineering, College of Engineering, Shantou University, Shantou, 515063, China

<sup>b</sup> Stephenson School of Biomedical Engineering, University of Oklahoma, Norman, Oklahoma 73019, USA

<sup>c</sup> College of Physics and Optoelectronic Engineering, Shenzhen University, Shenzhen, 518060, China

<sup>d</sup> Department of Thyroid and Breast Surgery, Clinical Research Center, The First Affiliated Hospital of Shantou University Medical College, Shantou, 515000, China

<sup>e</sup> Advanced Magnetic Resonance Center, Oklahoma Medical Research Foundation, Oklahoma City, Oklahoma, 73104, USA

**Keywords:** iron oxide nanoparticles, chemotherapy, immunosuppression, immune response, MR imaging

---

\* Corresponding author. E-mail address: bqzhou@stu.edu.cn (B. Zhou).

## **Part of Experimental Details:**

### **Materials**

Amine functionalized IONPs, MTX, BSA were purchased from Sigma-Aldrich (St. Louis, MO). Dulbecco's Modified Eagle Medium (DMEM), RPMI-1640 medium, fetal bovine serum (FBS), 0.25% Trypsin-EDTA, penicillin, and streptomycin were obtained from Gibco (Grand Island, NY). Cell Counting Kit-8 (CCK-8) assay kit and double stain apoptosis detection kit (calcein-AM/PI) were purchased from Dojindo Laboratories (Shanghai, China). BCA assay kit was obtained from Thermo Scientific (Mass).

### ***In vitro* drug release**

The IONPs@BSA-MTX complexes (0.5 mg/mL MTX) was dispersed into 0.8 mL of PBS (pH 7.4) or acetate buffer (pH 5.5) and placed in a dialysis bag (MWCO = 14 000). The dialysis bag was then immersed in the corresponding buffer medium with a volume of 7.2 mL and kept in a vapor-bathing constant temperature vibrator at 37 °C with a vibration speed of 200 rpm. At each time point, 0.8 mL of outer phase medium was taken out and the same volume of fresh corresponding buffer medium was replenished. The MTX release was quantified by UV-vis spectroscopy.

### **Cell culture**

4T1 cells, RAW264.7 macrophages, and DC2.4 cells were purchased from American Type Culture Collection (ATCC; Bethesda, MD). Bone-marrow-derived dendritic cells (BMDCs) were generated from C57BL/6 mice. 4T1 cells were cultured with RPMI-1640 medium containing 10% FBS and 1% penicillin and streptomycin. RAW264.7 macrophages, DC2.4 cells and BMDCs were cultured with DMEM containing 10% FBS, 1% penicillin and streptomycin.

### **Cytotoxicity assay**

For in vitro cytotoxicity assay of IONPs@BSA-MTX complexes, 4T1 cells (5000 cells per well) were seeded into a 96-well plate. After overnight incubation, the cells were cocultured with IONPs@BSA-MTX, IONPs@BSA or MTX at different concentrations for 24 h. A standard CCK-8 assay was then performed to obtain the relative cell viability according to the manufacturer's instructions. The morphology of the treated 4T1 cells was also investigated. Likewise, after 4T1 cells being treated with

those samples at different final concentrations for 24 h, the cells were also observed using Leica DM IL LED inverted phase contrast microscope (Wetzlar, Germany) with a magnification of  $100 \times$  for each sample.

### ***In vivo* MR imaging**

Mice bearing orthotopic 4T1 breast tumors were first anesthetized using 1.5% isoflurane at 0.7 L/min oxygen and placed in an MR probe at a supine position before imaging using a Bruker Biospec 7 T horizontal-bore imaging spectrometer (Bruker BioSpin MRI GmbH, Ettlingen, Germany).  $T_2$  weighted MR images were generated by a Bruker S116 gradient coil (2.0 mT/m/A), a 72 mm quadrature multirung radiofrequency coil for radiofrequency transmission and signal reception. For *in vivo* MR imaging, multiple MR slices were put in the transverse plane through a spin-echo multislice (repetition time, 0.8 s; echo time (TE), 63 ms;  $256 \times 256$  pixels matrix; 4 steps per acquisition; FOV,  $3.5 \times 3.5$  cm<sup>2</sup>; and slice thickness, 1mm).

**Table S1.** The hydrodynamic size of IONPs, IONPs@BSA, and IONPs@BSA-MTX complexes.

| Samples       | Hydrodynamic size (nm) | PDI               |
|---------------|------------------------|-------------------|
| IONPs         | $36.6 \pm 1.6$         | $0.169 \pm 0.041$ |
| IONPs@BSA     | $383.2 \pm 55.6$       | $0.261 \pm 0.221$ |
| IONPs@BSA-MTX | $376.8 \pm 31.1$       | $0.415 \pm 0.105$ |

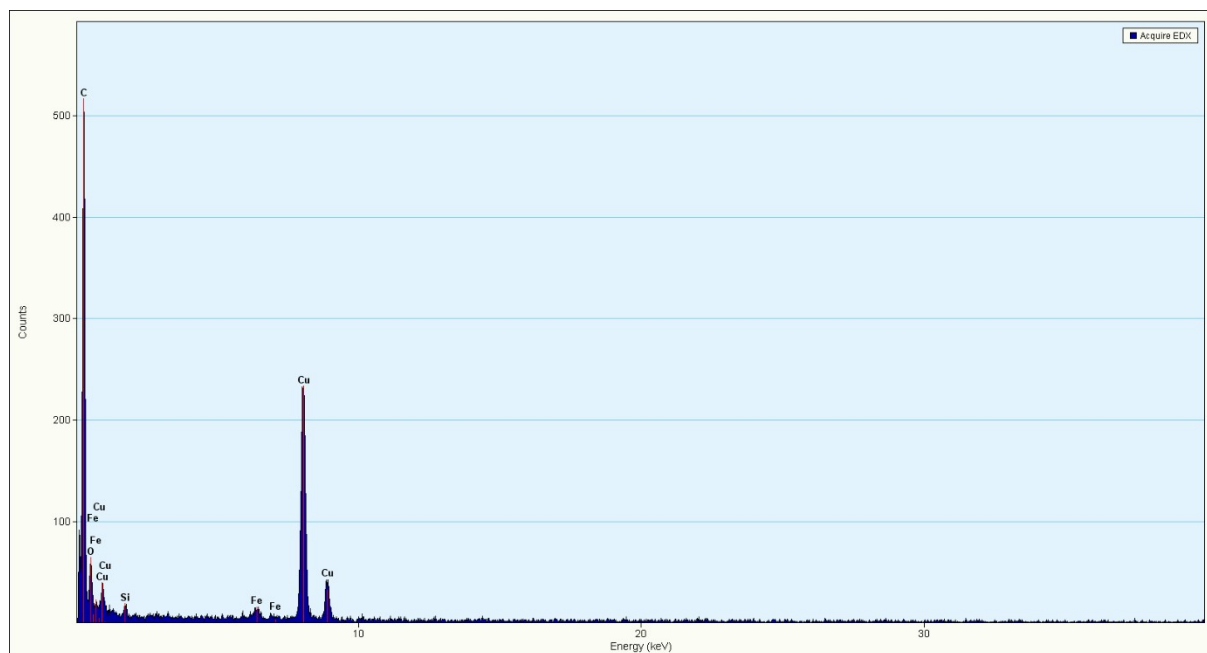

**Fig. S1.** The energy-dispersive X-ray spectroscopy (EDS) of the IONPs.

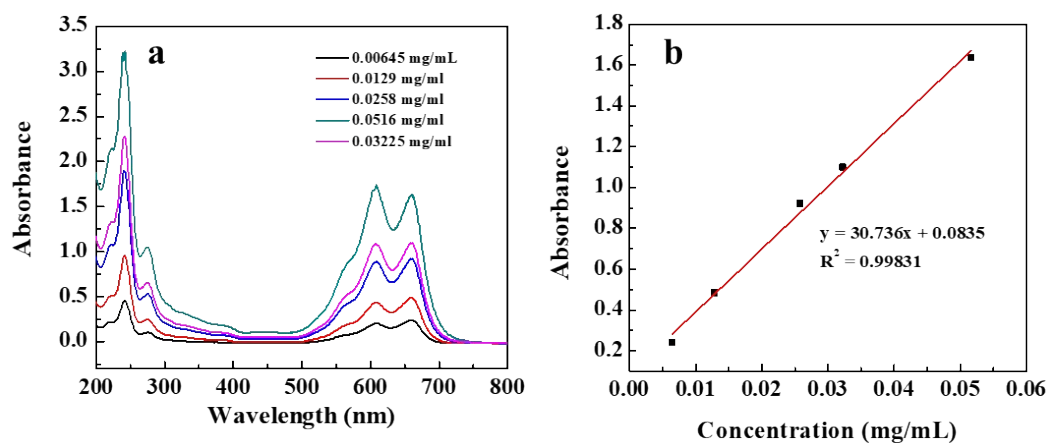

**Fig. S2.** (a) UV-vis spectra of MTX water solution at different concentrations. (b) The standard curve of calibration curve of MTX solution.

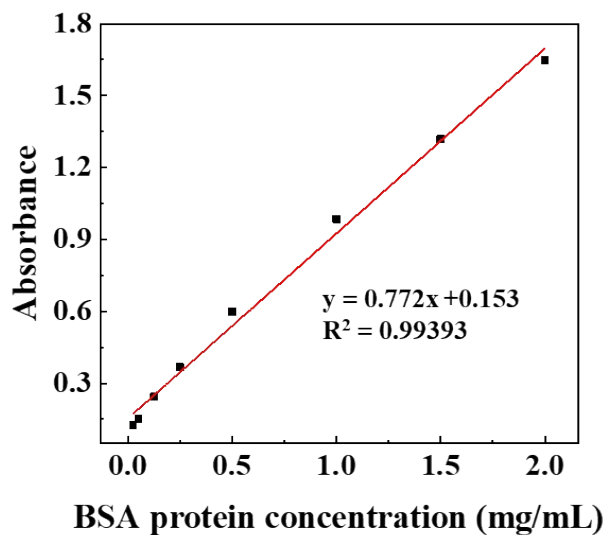

**Fig. S3.** The standard curve for BSA protein in the BCA protein assay.

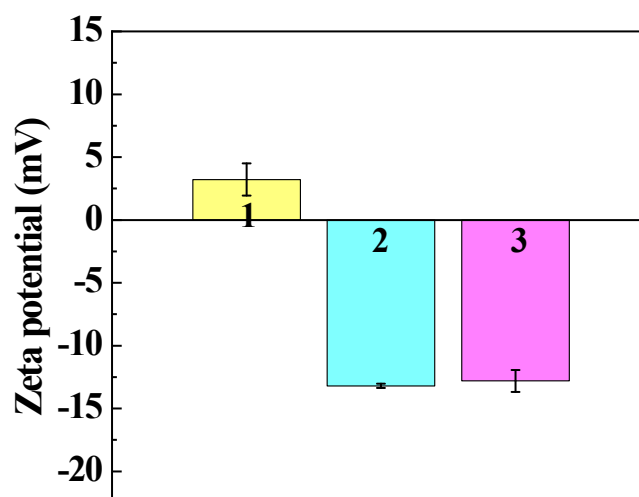

**Fig. S4.** Zeta potential of IONPs (1), IONPs@BSA (2), IONPs@BSA-MTX (3).

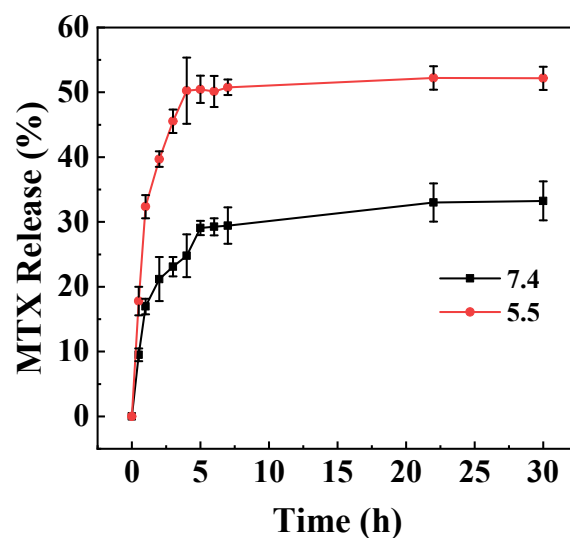

**Fig. S5.** Cumulative release of MTX from IONPs@BSA-MTX complexes in PBS (pH 7.4) and acetate buffer (pH 5.5) at 37 °C.

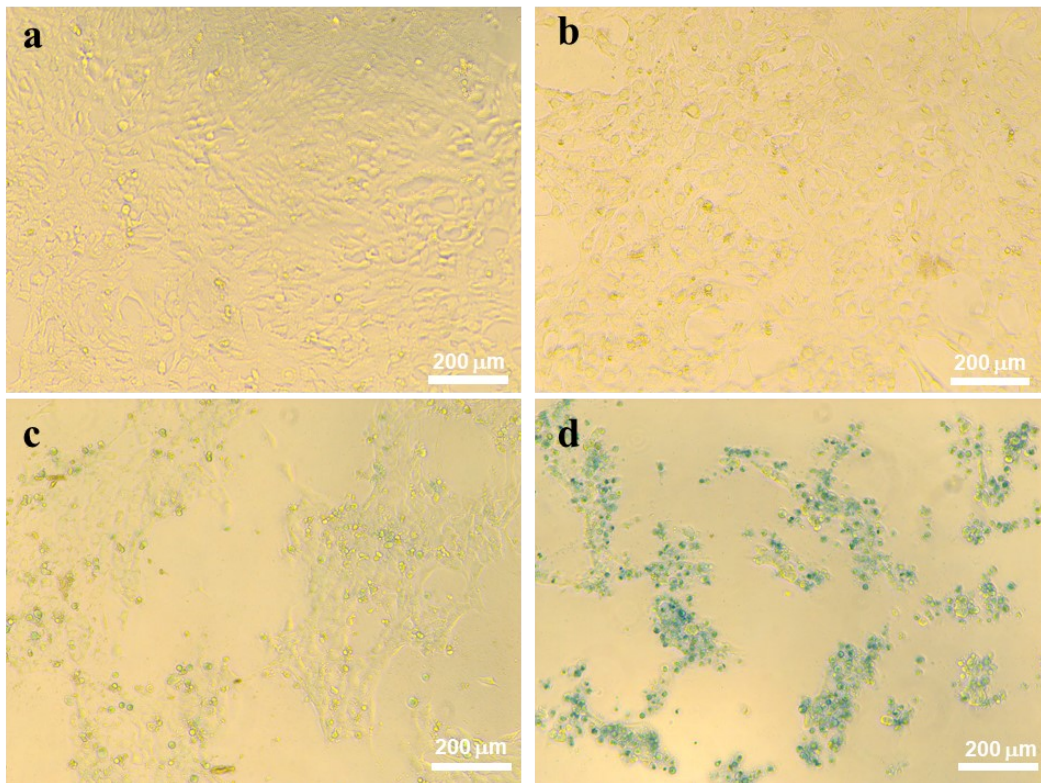

**Fig. S6.** The micrographs of 4T1 cells treated with PBS (a), IONPs@BSA (b) with same equivalent concentrations of IONPs@BSA-MTX complexes, IONPs@BSA-MTX complexes (c), MTX (d) at the 15  $\mu\text{g}/\text{mL}$  of MTX concentration, respectively.

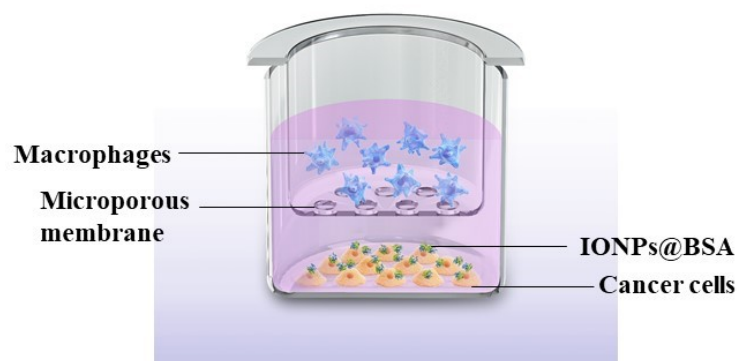

**Fig. S7.** Diagram shows macrophage-cancer cell co-culture set up in transwell plates.

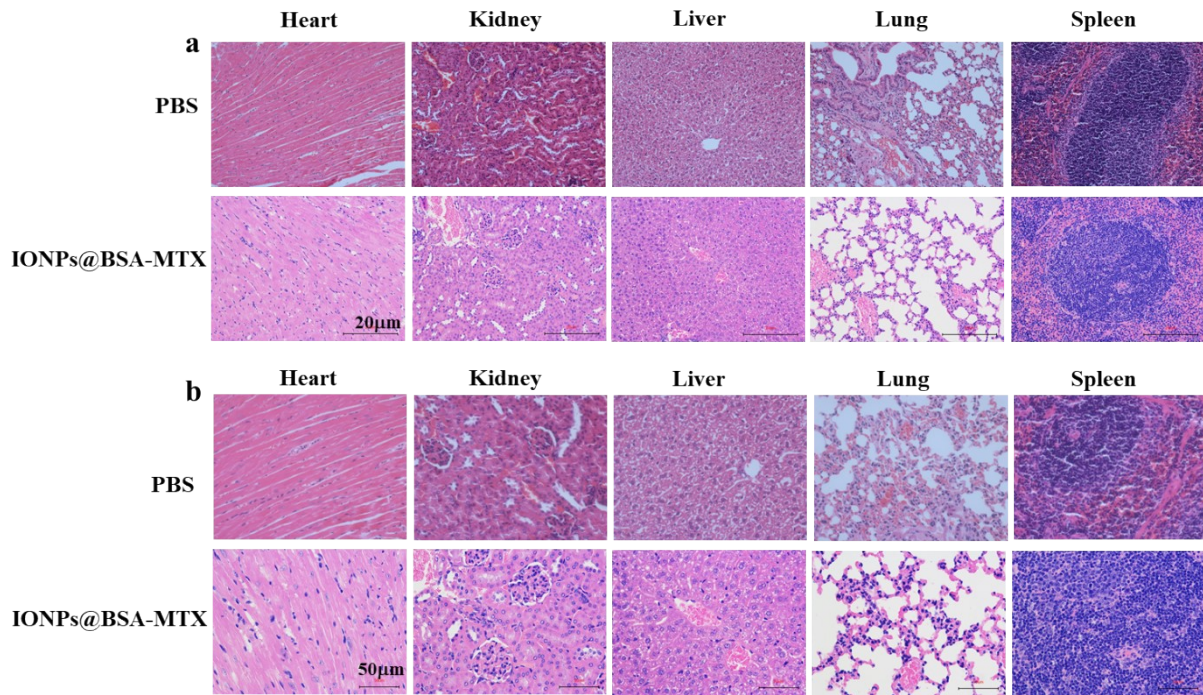

**Fig. S8.** Histological changes in the heart, kidney, liver, lung, and spleen of the healthy mouse at one month after intravenous injection of the IONPs@BSA-MTX complexes using hematoxylin-eosin (H&E) staining. The healthy mice treated by PBS as a control group. (a) and (b) were 200- and 400-times magnification photos, respectively.
